# Supplementary material
Source: MDPI journal article supplement (https://www.mdpi.com/2571-6255/5/4/119)
Supplement: s1 [file s1 › fire-1832407-supplementary.pdf]

Supplementary Materials

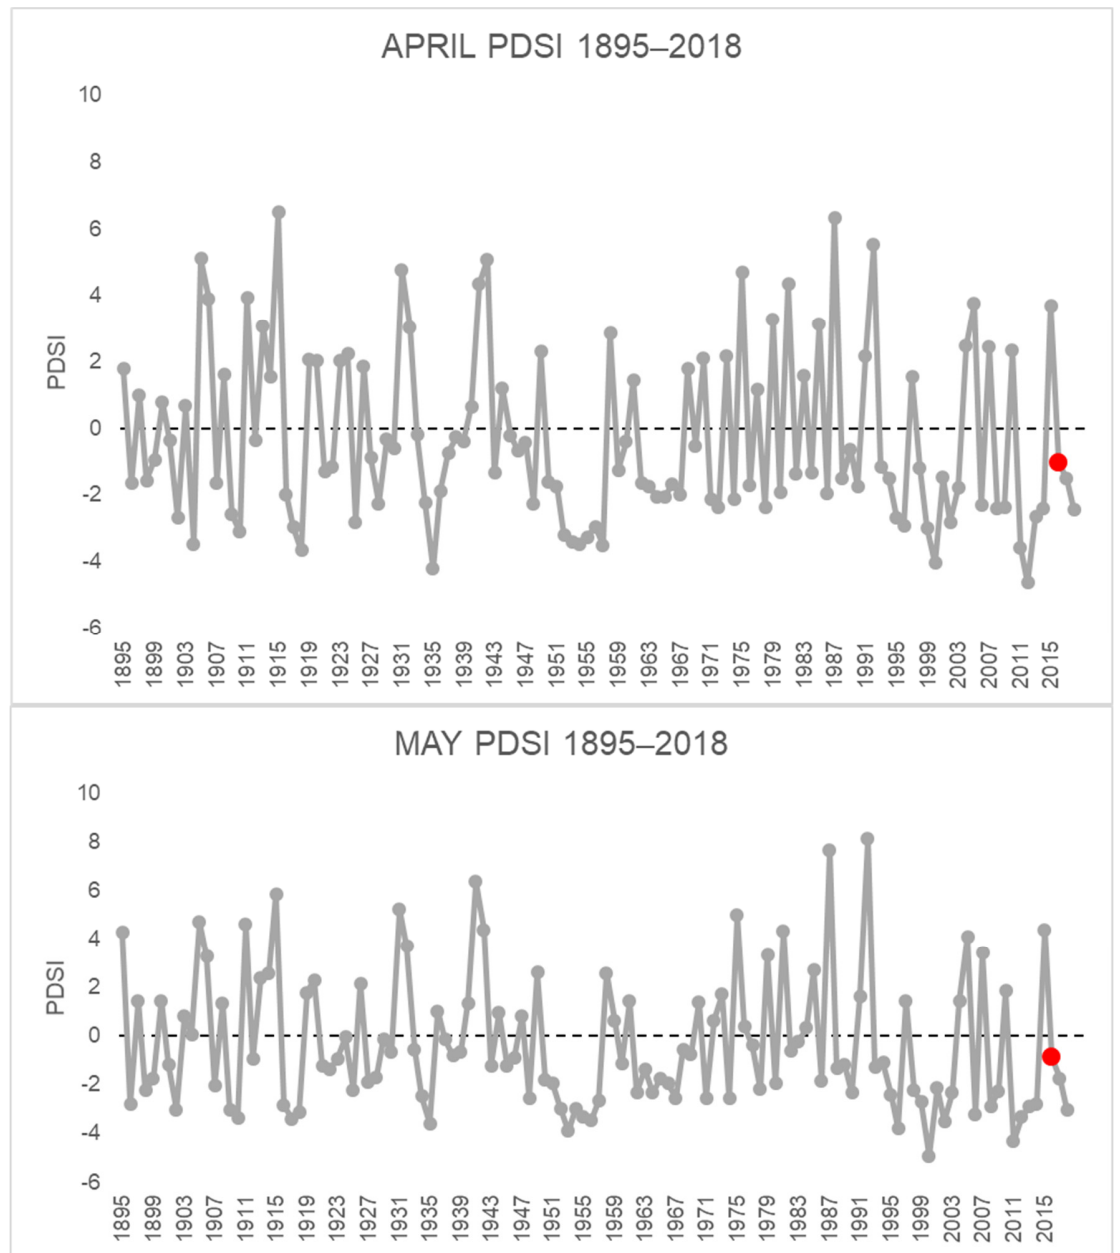

Figure S1. April (top panel) and May (bottom panel) Palmer Drought Severity Index for Texas climate division 5 (West Texas). Values less than zero indicate drought. The red point symbol indicates 2016.

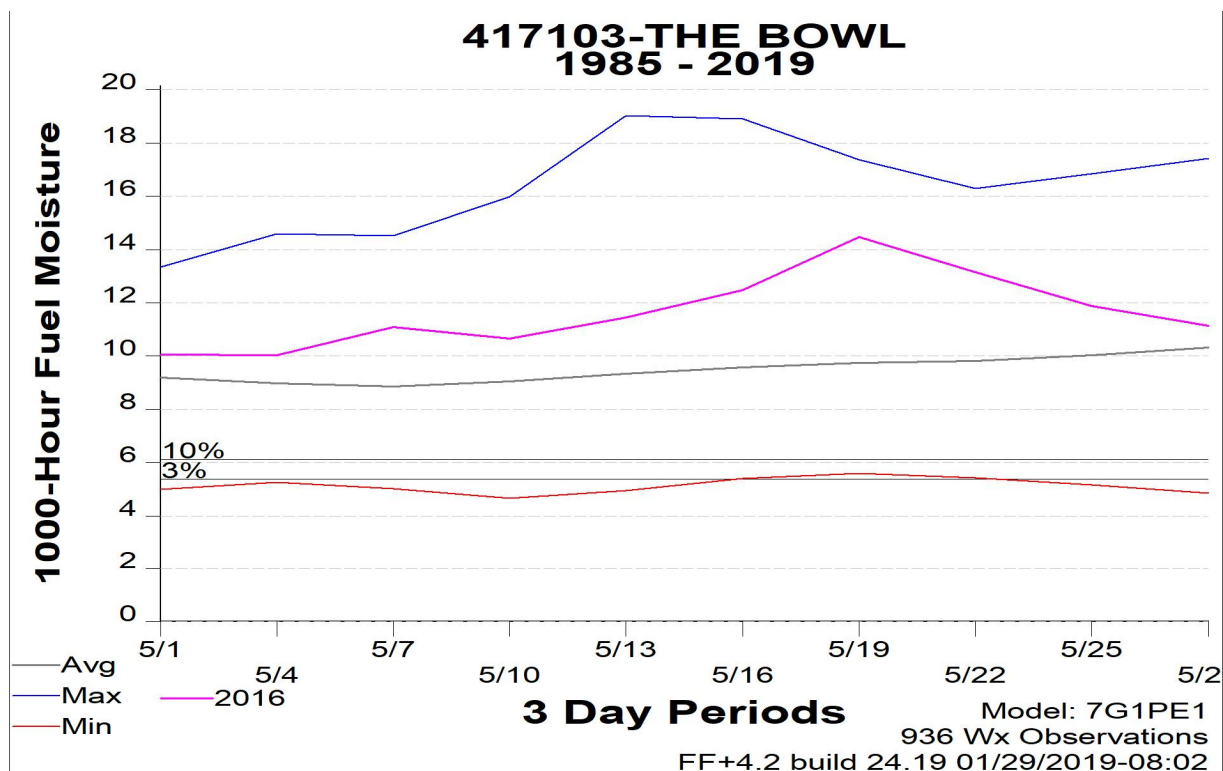

Figure S2. Moisture of 1000 hour fuels measured during the Coyote Fire (May 2016).
